# Supplementary material
Source: PubMed Central journal article supplement (PMC5753314)
Supplement: CJN.06550617SupplementaryData.pdf [file CJN.06550617SupplementaryData.pdf]

Supplemental material is neither peer-reviewed nor thoroughly edited by CJASN. The authors alone are responsible for the accuracy and presentation of the material.

**Supplementary Table 1.** Discard category mapping for unilaterally discarded kidneys (n = 7,625)

| Discard Category       | UNOS Code | Reason                                             | N    | Total N |
|------------------------|-----------|----------------------------------------------------|------|---------|
| Extended Ischemia      | 601       | Too old on pump                                    | 83   | 445     |
|                        | 602       | Too old on ice                                     | 258  |         |
|                        | 611       | Warm ischemic time too long                        | 40   |         |
|                        | 699       | Other, specify                                     | 64   |         |
| Organ Damage           | 603       | Vascular damage                                    | 336  | 817     |
|                        | 604       | Ureteral damage                                    | 49   |         |
|                        | 612       | Organ trauma                                       | 363  |         |
|                        | 699       | Other, specify                                     | 69   |         |
| Anatomical Abnormality | 619       | Anatomical abnormalities                           | 924  | 1029    |
|                        | 699       | Other, specify                                     | 105  |         |
| Poor Function          | 605       | Inadequate urine output                            | 3    | 934     |
|                        | 616       | Poor organ function                                | 704  |         |
|                        | 699       | Other, specify                                     | 227  |         |
| Donor History          | 606       | Donor Medical history                              | 76   | 563     |
|                        | 607       | Donor social history                               | 39   |         |
|                        | 608       | Positive CMV                                       | 3    |         |
|                        | 610       | Positive Hepatitis                                 | 144  |         |
|                        | 617       | Infection                                          | 4    |         |
|                        | 618       | Diseased organ                                     | 232  |         |
| Biopsy Findings        | 614       | Biopsy findings                                    | 1596 | 1645    |
|                        | 699       | Other, specify                                     | 49   |         |
| No Recipient Located   | 620       | No recipient located - list exhausted              | 963  | 1004    |
|                        | 699       | Other, specify                                     | 41   |         |
| Other                  | Missing   | Unknown                                            | 96   | 1188    |
|                        | 613       | Organ not as described                             | 61   |         |
|                        | 615       | Recipient determined to be unsuitable for TX in OR | 118  |         |
|                        | 699       | Other, specify                                     | 913  |         |

Supplemental material is neither peer-reviewed nor thoroughly edited by CJASN. The authors alone are responsible for the accuracy and presentation of the material.

**Supplementary Table 2.** Counts displayed for Table 4 (Kidney graft survival rates for (a) unilateral and (b) bilateral donor type transplants stratified by KDPI [adult single organ transplant recipients from 2000-2015 only])

| KDPI <sup>1</sup> | Counts (n) for Observed Single Kidney Graft Survival Rates |           |            |           |            |           |            |           |
|-------------------|------------------------------------------------------------|-----------|------------|-----------|------------|-----------|------------|-----------|
|                   | 1 Year                                                     |           | 2 Years    |           | 3 Years    |           | 5 Years    |           |
|                   | Unilateral                                                 | Bilateral | Unilateral | Bilateral | Unilateral | Bilateral | Unilateral | Bilateral |
| 1%                | 19                                                         | 1,946     | 16         | 1,850     | 16         | 1,739     | 13         | 1,524     |
| 5%                | 12                                                         | 1,640     | 10         | 1,552     | 9          | 1,456     | 9          | 1,278     |
| 10%               | 17                                                         | 1,585     | 17         | 1,497     | 16         | 1,417     | 14         | 1,214     |
| 20%               | 32                                                         | 1,495     | 30         | 1,363     | 29         | 1,275     | 25         | 1,079     |
| 30%               | 28                                                         | 1,366     | 28         | 1,250     | 23         | 1,154     | 20         | 997       |
| 40%               | 37                                                         | 1,595     | 34         | 1,487     | 31         | 1,381     | 27         | 1,186     |
| 50%               | 57                                                         | 1,389     | 49         | 1,277     | 45         | 1,177     | 39         | 1,026     |
| 60%               | 71                                                         | 1,244     | 65         | 1,152     | 58         | 1,072     | 52         | 940       |
| 70%               | 102                                                        | 1,477     | 89         | 1,345     | 80         | 1,259     | 60         | 1,082     |
| 80%               | 95                                                         | 1,057     | 91         | 974       | 82         | 903       | 72         | 785       |
| 90%               | 115                                                        | 720       | 111        | 678       | 100        | 644       | 83         | 576       |
| 95%               | 148                                                        | 746       | 140        | 711       | 134        | 661       | 117        | 581       |
| 99%               | 120                                                        | 448       | 114        | 430       | 109        | 417       | 98         | 367       |

<sup>1</sup>KDPI is calculated using the scaling factor for 2015
